# Supplementary material
Source: MDPI journal article supplement (https://www.mdpi.com/2077-0472/13/4/893)
Supplement: s1 [file s1]

## Supplementary material

**Supplementary Table S1.** Distribution of SSR loci in *CpTPS* genes.

| subfamily | gene ID        | promoter (2000bp<br>upstream of the gene) | gene | 2000bp sequence<br>downstream of the<br>gene | Total number<br>of each gene | Total number of<br>each subfamily | average of each<br>subfamily |
|-----------|----------------|-------------------------------------------|------|----------------------------------------------|------------------------------|-----------------------------------|------------------------------|
| TPS-a     | <i>CpTPS02</i> | 0                                         | 9    | 0                                            | 9                            | 62                                | 3.44                         |
|           | <i>CpTPS07</i> | 1                                         | 0    | 1                                            | 2                            |                                   |                              |
|           | <i>CpTPS08</i> | 1                                         | 0    | 0                                            | 1                            |                                   |                              |
|           | <i>CpTPS14</i> | 0                                         | 0    | 0                                            | 0                            |                                   |                              |
|           | <i>CpTPS15</i> | 0                                         | 0    | 1                                            | 1                            |                                   |                              |
|           | <i>CpTPS16</i> | 0                                         | 0    | 0                                            | 0                            |                                   |                              |
|           | <i>CpTPS20</i> | 0                                         | 1    | 0                                            | 1                            |                                   |                              |
|           | <i>CpTPS21</i> | 0                                         | 2    | 0                                            | 2                            |                                   |                              |
|           | <i>CpTPS22</i> | 0                                         | 3    | 0                                            | 3                            |                                   |                              |
|           | <i>CpTPS23</i> | 0                                         | 27   | 0                                            | 27                           |                                   |                              |
|           | <i>CpTPS24</i> | 0                                         | 0    | 0                                            | 0                            |                                   |                              |
|           | <i>CpTPS25</i> | 0                                         | 0    | 2                                            | 2                            |                                   |                              |
|           | <i>CpTPS39</i> | 0                                         | 1    | 0                                            | 1                            |                                   |                              |
|           | <i>CpTPS40</i> | 0                                         | 0    | 0                                            | 0                            |                                   |                              |
|           | <i>CpTPS44</i> | 0                                         | 0    | 2                                            | 2                            |                                   |                              |
|           | <i>CpTPS48</i> | 0                                         | 2    | 0                                            | 2                            |                                   |                              |
|           | <i>CpTPS49</i> | 0                                         | 2    | 0                                            | 2                            |                                   |                              |
|           | <i>CpTPS52</i> | 0                                         | 0    | 2                                            | 2                            |                                   |                              |
|           | <i>CpTPS01</i> | 0                                         | 5    | 0                                            | 5                            |                                   |                              |
|           | <i>CpTPS03</i> | 1                                         | 5    | 0                                            | 6                            |                                   |                              |
| TPS-b     | <i>CpTPS04</i> | 0                                         | 0    | 0                                            | 0                            | 67                                | 2.79                         |
|           | <i>CpTPS09</i> | 0                                         | 0    | 0                                            | 0                            |                                   |                              |
|           | <i>CpTPS17</i> | 2                                         | 0    | 0                                            | 2                            |                                   |                              |
|           | <i>CpTPS18</i> | 1                                         | 0    | 0                                            | 1                            |                                   |                              |
|           | <i>CpTPS19</i> | 0                                         | 2    | 0                                            | 2                            |                                   |                              |
|           | <i>CpTPS26</i> | 1                                         | 3    | 0                                            | 4                            |                                   |                              |
|           | <i>CpTPS27</i> | 3                                         | 1    | 0                                            | 4                            |                                   |                              |
|           | <i>CpTPS28</i> | 1                                         | 0    | 1                                            | 2                            |                                   |                              |
|           | <i>CpTPS29</i> | 1                                         | 4    | 0                                            | 5                            |                                   |                              |
|           | <i>CpTPS30</i> | 1                                         | 1    | 0                                            | 2                            |                                   |                              |
|           | <i>CpTPS31</i> | 1                                         | 2    | 1                                            | 4                            |                                   |                              |
|           | <i>CpTPS32</i> | 2                                         | 0    | 0                                            | 2                            |                                   |                              |
|           | <i>CpTPS33</i> | 1                                         | 5    | 0                                            | 6                            |                                   |                              |
|           | <i>CpTPS34</i> | 1                                         | 1    | 1                                            | 3                            |                                   |                              |
|           | <i>CpTPS36</i> | 1                                         | 4    | 0                                            | 5                            |                                   |                              |
|           | <i>CpTPS37</i> | 1                                         | 0    | 1                                            | 2                            |                                   |                              |
|           | <i>CpTPS38</i> | 1                                         | 2    | 0                                            | 3                            |                                   |                              |
|           | <i>CpTPS43</i> | 0                                         | 1    | 1                                            | 2                            |                                   |                              |
|           | <i>CpTPS45</i> | 1                                         | 0    | 1                                            | 2                            |                                   |                              |
|           | <i>CpTPS46</i> | 2                                         | 0    | 0                                            | 2                            |                                   |                              |
| TPS-c     | <i>CpTPS47</i> | 1                                         | 1    | 0                                            | 2                            | 4                                 | 4                            |
|           | <i>CpTPS50</i> | 1                                         | 0    | 0                                            | 1                            |                                   |                              |
|           | <i>CpTPS10</i> | 1                                         | 2    | 1                                            | 4                            |                                   |                              |
| TPS-e/f   | <i>CpTPS05</i> | 1                                         | 2    | 0                                            | 3                            | 17                                | 3.40                         |
|           | <i>CpTPS06</i> | 3                                         | 4    | 0                                            | 7                            |                                   |                              |
|           | <i>CpTPS11</i> | 0                                         | 2    | 1                                            | 3                            |                                   |                              |
|           | <i>CpTPS12</i> | 1                                         | 1    | 0                                            | 2                            |                                   |                              |
| TPS-g     | <i>CpTPS13</i> | 0                                         | 1    | 0                                            | 1                            | 2                                 | 0.50                         |
|           | <i>CpTPS35</i> | 0                                         | 1    | 0                                            | 1                            |                                   |                              |
|           | <i>CpTPS41</i> | 0                                         | 0    | 0                                            | 0                            |                                   |                              |
|           | <i>CpTPS42</i> | 0                                         | 0    | 0                                            | 0                            |                                   |                              |
|           | <i>CpTPS51</i> | 0                                         | 1    | 0                                            | 1                            |                                   |                              |
|           | total          | 32                                        | 98   | 16                                           | 146                          |                                   |                              |
|           | average        | 0.62                                      | 1.88 | 0.31                                         | 2.81                         |                                   |                              |

**Supplementary Table S2.** Basic information of 33 pairs of SSR primers

| Site name     | Upstream primer           | Downstream primer           | Annealing temperature (°C) |
|---------------|---------------------------|-----------------------------|----------------------------|
| CpTPSMS01-4   | TGAAATTCTCAATATCGT AACTTC | GGGTTCAAATCCATATGTGCG       | 57                         |
| CpTPSMS01-5   | TTGTTTGGCTTAAGATTAGGTTT   | TGGACATACTTGGGCTTTCA        | 57                         |
| CpTPSMS02-7   | TGATTTGATCCACTGTGGTTAG    | TCGGCCGATAAATTTCTTCT        | 56                         |
| CpTPSMS03-1   | ACATTGCATGTGCTTCGC        | GCAATGATCTTGTACCTTG         | 58                         |
| CpTPSMS03-2   | GGCCTTCTTCAGAGATGTGG      | CGTTTTGGTTGTTGCATACG        | 58                         |
| CpTPSMS03-4   | CCGATTTTTAAACCCCTGTTC     | TCTGAGTGGAGAGGGAAGGA        | 58                         |
| CpTPSMS03-5   | CAAATTCGGGCTCTTTAAGG      | GTTTGATTGCCACTCCACCT        | 56                         |
| CpTPSMS03-6   | TGCTTCGAACCTCAATTCAA      | TTGCGTTTTTGAAGAGTGTACC      | 56                         |
| CpTPSMS05-1   | ATTTCCTGTGGCTGTGGAG       | GAAATAGACGTTTTGGAGTTG<br>G  | 58                         |
| CpTPSMS05-2   | TTGAACTGCCTTTTCTTTTCG     | GCTTGTGTCTCCCACCATCT        | 59                         |
| CpTPSMS05-3   | AATTGGGAATGGATGAAACAA     | TTGTTGAACATCTCCATTCAA<br>A  | 55                         |
| CpTPSMS06-1   | CTCTCTTTCGCCCAACTCTT      | GAAAGACAAGGCCTCCATCA        | 58                         |
| CpTPSMS06-3   | TCCTCATGTATTGGCTCTGCT     | TTTGGCATACCACATCAACG        | 59                         |
| CpTPSMS06-4   | TGCATCCACCTGAATGTGTAA     | TGTTGGTCAGTTAAGGGTTGG       | 58                         |
| CpTPSMS06-5   | TTGCTCCTCAGTCCTTCTCC      | TTACAAAGGGGCACACTCC         | 57                         |
| CpTPSMS10-2   | GATTTTGTATTGACTTTTTACAA   | ACGTCTTCATTAAGTATCAGC<br>AA | 58                         |
| CpTPSMS10-3   | GCAGGTTGGGAATATTTGGA      | TTCAATTGCAACGGGACTTT        | 57                         |
| CpTPSMS11-1   | GTCATGGGCCGTAGGATATG      | GGATGAATTCCAACCCTGAA        | 56                         |
| CpTPSMS11-2   | GGCATACCGCCTCCTAACTT      | AGGAATATCCACCGGTCACA        | 56                         |
| CpTPSMS12-1   | TGACGGTATGCGAGTGGTTA      | AAGGAAAAGAAAAATCAAAA<br>GGT | 56                         |
| CpTPSMS12-2   | CCTTTCGACTCATTCGCTCT      | GAGCAAGCCATGGAAGTTCT        | 58                         |
| CpTPSMS13     | GCCCTTTCGACTCATTCATT      | AGATGGTCCAATCGAGCAAG        | 58                         |
| CpTPSMS19-CDs | GAAATGGAGGAGCAAGGAAA      | CAGATCGCCTGAGAACCATT        | 59                         |
| CpTPSMS19     | TTTGGGACGACAACCTCCTC      | GCAAATTCCTTGCATATTCTTT<br>C | 56                         |
| CpTPSMS23-6   | ATGCAGTAAAACCCGTGTGCG     | GCCATTGAGCTTCCTTGAAAT       | 57                         |
| CpTPSMS23-21  | GACCTGACCCGATGTAACCT      | GCTAACAAAACAGTCACCCG<br>A   | 58                         |
| CpTPSMS26-4   | AAATGCAATTTAAAGCCATCA     | TAGCCATGATTTTCGCAGTG        | 59                         |
| CpTPSMS33-6   | TGTGACATTTGCTTGTTCAA      | CACCAAAGAAAGGTGTGCAA        | 59                         |
| CpTPSMS38-2   | CTCTGGTGCCACCTAGGAAC      | AGAGCCAAACGATGACCAAA        | 59                         |
| CpTPSMS43-1   | TTGCCTTCATTTTCTCGTTG      | GCCCTGCGTTCATGTGTATT        | 59                         |
| CpTPSMS47-1   | CCAATCCACAACCCCATATC      | ATCCCATATGTTGGGCATGT        | 59                         |
| CpTPSMS47-2   | CGACTCGGGCTCTCAAAATA      | GTGGAATCCAAGCACTCGTC        | 60                         |
| CpTPSMS52-1   | TCAAAAGTTGTGCAACAATCAA    | CATCACGACTCCATGACAGG        | 59                         |

**Supplementary Table S3.** Percentage of variation explained by the first 3 axes

| Axis  | 1     | 2     | 3     |
|-------|-------|-------|-------|
| %     | 22.66 | 12.75 | 11.10 |
| Cum % | 22.66 | 35.41 | 46.51 |
